# Supplementary material
Source: PubMed Central journal article supplement (PMC3365923)
Supplement: supp_M112.355958_jbc.M112.355958-1.pdf [file supp_M112.355958_jbc.M112.355958-1.pdf]

**Table S1: Statistical analysis of prion infectivity shown in Fig. 2A, B and C.** Mantel-Haenszel common odds ratio (c.o.r.) estimate is given with a 95% confidence interval comparing number of negative wells at each dilution ( $10^{-4}$  to  $10^{-8}$ ) of a sample in the SCEPA. P-values indicate statistical difference to control. Statistical analysis of the differences of efficiency between drugs was only performed for PTAA, pHTAA and pFTAA. Analysis of all molecules would require a Bonferroni correction that would decrease statistical significance.

| Fig. 2A          | $\mu\text{g ml}^{-1}$ | p-values    | conf. interval for c.o.r. |
|------------------|-----------------------|-------------|---------------------------|
| Control to PTAA  | 300                   | $p < 0.001$ |                           |
| Control to pHTAA | 300                   | $p < 0.001$ |                           |
| Control to pFTAA | 300                   | $p < 0.001$ |                           |
| Control to PBAT  | 300                   | $p < 0.001$ |                           |
| Control to POMT  | 300                   | $p < 0.001$ |                           |
| Control to POWT  | 300                   | $p < 0.001$ |                           |
| pHTAA vs PTAA    | 300                   | $p = 0.450$ | 1.69(0.61-4.67)           |
| pFTAA vs PTAA    | 300                   | $p = 0.005$ | 0.13(0.03-0.50)           |
| pFTAA vs pHTAA   | 300                   | $p = 0.001$ | 10(2.66-37.64)            |

| Fig. 2B          | $\mu\text{g ml}^{-1}$ | p-values     | conf. interval for c.o.r. |
|------------------|-----------------------|--------------|---------------------------|
| Control to pFTAA | 900                   | $p < 0.0001$ |                           |
|                  | 300                   | $p = 0.002$  | 0.07(0.01-0.36)           |
|                  | 150                   | $p = 0.004$  | 0.15(0.04-0.52)           |
|                  | 75                    | $p = 0.047$  | 0.32(0.12-0.87)           |

| Fig. 2C         | $\mu\text{g ml}^{-1}$ | p-values     | conf. interval for c.o.r. |
|-----------------|-----------------------|--------------|---------------------------|
| Control to PTAA | 5000                  | $p < 0.0001$ |                           |
|                 | 900                   | $p < 0.0001$ |                           |

|  |     |              |                 |
|--|-----|--------------|-----------------|
|  | 300 | $p < 0.0001$ |                 |
|  | 150 | $p < 0.0001$ |                 |
|  | 100 | $p < 0.0003$ | 0.16(0.06-0.43) |
|  | 10  | $p = 0.081$  | 0.34(0.12-0.99) |

**Table S2: Comparison of infectivities of samples described in Fig. S7A.** Differences were computed by using a Mantel-Haenszel Chi-square test for comparing number of negative wells at each dilution ( $10^{-4}$  to  $10^{-8}$ ) of a sample in the SCEPA.

| Plate n°:                                                         | 1    | 2         | 3                            | 4                            |
|-------------------------------------------------------------------|------|-----------|------------------------------|------------------------------|
| Infectivity (log TC <sub>I</sub> <sub>50</sub> g <sup>-1</sup> ): | 7.91 | 6.83      | 8.05                         | 7.80                         |
| 1                                                                 |      | p < 0.001 | p = 0.398<br>1.89(0.62-5.79) | p = 0.826<br>0.78(0.29-2.15) |
| 2                                                                 |      |           | p < 0.001                    | p < 0.001                    |
| 3                                                                 |      |           |                              | p = 0.178<br>0.39(0.13-1.24) |

**Table S3: Infectivity of samples described in Fig. S7B.**

|                                                        |      |      |
|--------------------------------------------------------|------|------|
| Plate n°:                                              | 1    | 2    |
| PTAA ( $\mu\text{g ml}^{-1}$ ):                        | 0    | 10   |
| Infectivity ( $\log \text{TCI}_{50} \text{ g}^{-1}$ ): | 8.05 | 7.78 |

The difference between the non- and PTAA-treated samples was computed by using a Mantel-Haenszel Chi-square test for comparing the number of negative wells at each dilution ( $10^{-4}$  to  $10^{-8}$ ) of a sample in the SCEPA:  $p = 0.551$  (n.s.) and conf. interval for c.o.r.: 0.58(0.17-1.92).

**Table S4: Summary of end-point titrations of RML6 inoculums in tga20 mice**

| Dilution of brain homogenate <sup>a</sup> | (Clinical TSE/total inoculated) | Mean incubation period (days) |
|-------------------------------------------|---------------------------------|-------------------------------|
| 10 <sup>-3</sup>                          | 4/4                             | 77.8 ± 1.3                    |
| 10 <sup>-4</sup>                          | 5/5                             | 56.4 ± 23.5                   |
| 10 <sup>-5</sup>                          | 4/4                             | 95 ± 5.8                      |
| 10 <sup>-6</sup>                          | 4/4                             | 105.8 ± 8.4                   |
| 10 <sup>-7</sup>                          | 3/4                             | 96, 107, 247, >249            |
| 10 <sup>-8</sup>                          | 0/4                             | >253                          |
| 10 <sup>-9</sup>                          | 0/4                             | >253                          |
| 10 <sup>-10</sup>                         | 1/4                             | 70, >253                      |

<sup>a</sup> Dilutions were started from a 10% brain homogenate.

**Table S5: Statistical analysis of the data presented in Fig. 2D.**

|                                                     | $\mu\text{g ml}^{-1}$ | p-values  | conf. interval for mean ratio |
|-----------------------------------------------------|-----------------------|-----------|-------------------------------|
| mock + H <sub>2</sub> O to mock + PTAA <sup>1</sup> | 0 to 300              | p = 0.001 | 1.21(1.12-1.30)               |
| Control to PTAA <sup>1</sup>                        | 300                   | p < 0.001 | 8.95(6.57-12.20)              |
|                                                     | 100                   | p < 0.001 | 6.50(4.89-8.65)               |
|                                                     | 10                    | p = 0.004 | 1.97(1.37-2.82)               |
|                                                     | 1                     | p = 0.348 | 1.23(0.74-2.04)               |
| Control to POMT <sup>1</sup>                        | 300                   | p < 0.001 | 9.80(7.21-13.33)              |
|                                                     | 100                   | p < 0.001 | 3.27(2.30-4.67)               |
|                                                     | 10                    | p = 0.015 | 1.75(1.17-2.63)               |
|                                                     | 1                     | p = 0.374 | 1.15(0.81-1.62)               |
| Control to pHTAA <sup>1</sup>                       | 300                   | p < 0.001 | 3.14(2.25-4.38)               |
|                                                     | 100                   | p = 0.007 | 2.21(1.37-3.55)               |
|                                                     | 10                    | p = 0.057 | 1.49(0.86-2.25)               |
|                                                     | 1                     | p = 0.737 | 0.95(0.69-1.32)               |
| Control to pFTAA <sup>1</sup>                       | 300                   | p < 0.001 | 3.79(2.66-5.41)               |
|                                                     | 100                   | p < 0.001 | 3.86(2.57-5.80)               |
|                                                     | 10                    | p = 0.003 | 2.39(1.56-3.68)               |
|                                                     | 1                     | p = 0.028 | 1.55(1.07-2.25)               |

|                            |           |           |                 |
|----------------------------|-----------|-----------|-----------------|
| PTAA to POMT <sup>2</sup>  | All conc. | p = 0.078 | 1.20(0.66-1.01) |
| PTAA to pHTAA <sup>2</sup> | All conc. | p < 0.001 | 0.51(0.42-0.63) |
| PTAA to pFTAA <sup>2</sup> | All conc. | p = 0.017 | 0.79(0.64-0.97) |
| POMT to pHTAA <sup>2</sup> | All conc. | p < 0.001 | 0.62(0.51-0.77) |
| POMT to pFTAA <sup>2</sup> | All conc. | p = 1.000 | 1.04(0.78-0.85) |

|                             |           |           |                 |
|-----------------------------|-----------|-----------|-----------------|
| pHTAA to pFTAA <sup>2</sup> | All conc. | p < 0.001 | 1.53(1.24-1.89) |
|-----------------------------|-----------|-----------|-----------------|

<sup>1</sup> P-values represent the statistical difference between non- (control) and LCP-treated RML6 samples. The first lane of the table describes the difference between non-treated (mock) and PTAA-treated non-infected brain homogenate from CD1 mice. Differences were computed by using a T- test comparing the log<sub>10</sub> RLU signals in the MPA.

<sup>2</sup> P-values represent statistical difference between groups of four concentrations of each LCP compared as groups by using a two-tailed independent sample T-test (equal variances assumed) comparing log<sub>10</sub> RLU signal in the MPA.

**Table S6: Statistical analysis of the data shown in Fig. S10.** The difference between MPA signals for untreated CD1 brain homogenate (mock) and PTAA-treated CD1 brain homogenate and for untreated RML6 (control) and PTAA-treated RML6 were computed by using a T- test comparing  $\log_{10}$  RLU signal in the MPA.

|                                              | bead treatment | p-values  | conf. interval for mean ratio |
|----------------------------------------------|----------------|-----------|-------------------------------|
| CD1+H <sub>2</sub> O to CD1+PTAA             | No             | p = 0.339 | 1.08(0.90-1.31)               |
| CD1+H <sub>2</sub> O to CD1+H <sub>2</sub> O | Yes            | p = 0.004 | 1.29(1.12-1.49)               |
| CD1+PTAA to CD1+PTAA                         | Yes            | p = 0.024 | 1.24(1.04-1.48)               |
| RML+PTAA to RML+PTAA                         | Yes            | p = 0.992 | 1.00(0.69-1.45)               |
| Control to RML+H <sub>2</sub> O              | Yes            | P = 0.274 | 1.10(0.91-1.32)               |



**Table S7: Statistical analysis shown in Fig. 4.**

| Fig. 4B <sup>1</sup>          | p-values  | Conf. interval for c. o. r. |
|-------------------------------|-----------|-----------------------------|
| Non-treated (21 DIV)          | p = 0.007 | -1.71(-2.35 to -1.07)       |
| PPS 0.3 µg ml <sup>-1</sup>   | p = 0.012 | 1.99(-2.96 to -1.03)        |
| PTAA 60 µg ml <sup>-1</sup>   | p < 0.001 | -3.32(-3.62 to -3.01)       |
| PTAA 6 µg ml <sup>-1</sup>    | p = 0.001 | -2(-2.19 to -1.81)          |
| PTAA 1 µg ml <sup>-1</sup>    | p = 0.106 | -0.66(-1.66 to 0.34)        |
| PTAA 0.1 µg ml <sup>-1</sup>  | p = 0.695 | -0.13(-1.36 to 1.10)        |
| PTAA 0.01 µg ml <sup>-1</sup> | n/a       | n/a                         |

| Fig. 4C <sup>2</sup>        | p-values   | 95% c.i. of difference   |
|-----------------------------|------------|--------------------------|
| Untreated (21 DIV)          | p < 0.0001 | -228.7(-309.8 to -147.6) |
| PPS 0.3 µg ml <sup>-1</sup> | p < 0.0001 | 216.9(135.8 to 298.0)    |
| PTAA 60 µg/ml               | p < 0.0001 | 236.1(155.0 to 317.1)    |
| PTAA 6 µg/ml                | p < 0.0001 | 233.9(152.8 to 315.0)    |
| PTAA 1 µg/ml                | p < 0.0001 | 229.0(147.9 to 310.1)    |
| PTAA 0.1 µg/ml              | p < 0.0001 | 199.4(118.4 to 280.5)    |
| PTAA 0.01 µg/ml             | n/s        | -46.9(-128.0 to 34.18)   |

| Fig. 4D <sup>3</sup>        | p-values  | 95% c.i. of difference   |
|-----------------------------|-----------|--------------------------|
| Untreated (21 DIV)          | p < 0.001 | -41.79(-66.96 to -16.62) |
| PPS 0.3 µg ml <sup>-1</sup> | p < 0.001 | 37.56(12.39 to 62.73)    |
| PTAA 60 µg ml <sup>-1</sup> | p < 0.001 | 42.94(17.77 to 68.11)    |
| PTAA 6 µg ml <sup>-1</sup>  | p < 0.001 | 40.57(15.40 to 65.74)    |
| PTAA 1 µg ml <sup>-1</sup>  | p < 0.001 | 35.09(9.917 to 60.26)    |

|                                 |             |                        |
|---------------------------------|-------------|------------------------|
| PTAA 0.1 $\mu\text{g ml}^{-1}$  | $p < 0.001$ | 26.51(1.36 to 51.70)   |
| PTAA 0.01 $\mu\text{g ml}^{-1}$ | $p = 0.450$ | 12.11(-13.06 to 37.28) |

<sup>1</sup> Statistical analysis of prion infectivity using a Mantel-Haenszel Chi-square test with Bonferroni correction comparing  $\text{TCI}_{50}$  difference to control (COCS homogenates from untreated cultures harvested after 42 dpi).

<sup>2,3</sup> Statistical analysis using a one-way ANOVA with Tukey's multiple comparison test.

**Table S8: Statistical analysis of data shown in Fig. 4D using a one-way ANOVA with Tukey's multiple comparison test.**

| Fig. 4D                  | p-value    | 95% c.i. of difference |
|--------------------------|------------|------------------------|
| PTAA 60 $\mu\text{g/ml}$ | $p < 0.05$ | 47.70(0.65 to 94.75)   |

**Table S9: Statistical analysis shown in Fig. 5 using a one-way ANOVA with Tukey's multiple comparison test.**

| Fig. 5A     | p-values  | 95% c.i. of difference   |
|-------------|-----------|--------------------------|
| 7 DIV       | ns        | -9(-108.8 to 90.80)      |
| 19 DIV      | ns        | -13.86(-113.7 to 85.94)  |
| 21 DIV      | ns        | -23.77(-123.6 to 76.03)  |
| 28 DIV      | ns        | -60.36(-160.2 to 39.44)  |
| 35 DIV      | p < 0.001 | -205.5(-305.3 to -105.7) |
| 42 DIV      | p < 0.001 | -252.8(-352.6 to 153.0)  |
| From 7 DIV  | ns        | -2.11(-101.9 to 97.68)   |
| From 19 DIV | ns        | -1.26(-101.1 to 98.54)   |
| From 21 DIV | ns        | 0(-99.80 to 99.80)       |
| From 28 DIV | ns        | -0.49(-100.3 to 99.30)   |
| From 35 DIV | ns        | -0.04(-99.84 to 99.75)   |

| Fig. 5B    | p-values  | 95% c.i. of difference |
|------------|-----------|------------------------|
| 7 DIV      | n/s       | 0(-38 to 38)           |
| 19 DIV     | n/s       | -0.09(-38 to 38)       |
| 21 DIV     | n/s       | -0.95(-39 to 37)       |
| 28 DIV     | n/s       | -6.2(-44 to 32)        |
| 35 DIV     | n/s       | -16(-54 to 21)         |
| 42 DIV     | p < 0.001 | -54(-92 to -17)        |
| 45 DIV     | p < 0.001 | -113(-151 to -76)      |
| 49 DIV     | p < 0.001 | -114(-152 to -76)      |
| 56 DIV     | p < 0.001 | -114(-152 to -77)      |
| From 7 DIV | n/s       | -0.43(-38 to 37)       |

|                        |           |                 |
|------------------------|-----------|-----------------|
| From 19 DIV            | n/s       | 0(-38 to 38)    |
| From 21 DIV            | n/s       | 0(-38 to 38)    |
| From 28 DIV            | n/s       | -4.6(-42 to 33) |
| From 35 DIV            | n/s       | -21(-59 to 17)  |
| 42 DIV vs. from 7 DIV  | p < 0.001 | 54(16 to 92)    |
| 42 DIV vs. from 19 DIV | p < 0.001 | 54(17 to 92)    |
| 42 DIV vs. from 21 DIV | p < 0.001 | 54(17 to 92)    |
| 42 DIV vs. from 28 DIV | p < 0.01  | 50(12 to 87)    |
| 42 DIV vs. from 35 DIV | n/s       | 33(-4.5 to 71)  |

| Fig. 5C               | p-values | 95% c.i. of difference |
|-----------------------|----------|------------------------|
| 7 DIV                 | ns       | 44(-174 to 261)        |
| 19 DIV                | ns       | 71(-146 to 289)        |
| 21 DIV                | ns       | 67(-151 to 284)        |
| 28 DIV                | ns       | 52(-165 to 270)        |
| 35 DIV                | ns       | 162(-55 to 380)        |
| 42 DIV                | ns       | 53(-165 to 270)        |
| 45 DIV                | ns       | 107(-110 to 325)       |
| 49 DIV                | ns       | 14(-203 to 232)        |
| 56 DIV                | ns       | 88(-130 to 305)        |
| From 7 DIV            | ns       | 211(-6.6 to 428)       |
| From 19 DIV           | ns       | 196(-22 to 413)        |
| From 21 DIV           | p < 0.05 | 223(5.7 to 441)        |
| From 28 DIV           | ns       | 189(-28 to 407)        |
| From 35 DIV           | p < 0.05 | 236(18 to 453)         |
| 42 DIV vs. from 7 DIV | ns       | 158(59 to 376)         |

|                        |    |                 |
|------------------------|----|-----------------|
| 42 DIV vs. from 19 DIV | ns | 143(-74 to 361) |
| 42 DIV vs. from 21 DIV | ns | 170(-47 to 388) |
| 42 DIV vs. from 28 DIV | ns | 136(-81 to 354) |
| 42 DIV vs. from 35 DIV | ns | 183(-34 to 400) |

Statistical analysis using a one-way ANOVA with Tukey's multiple comparison test. Unless stated otherwise, time points are compared to the non-infected COCS. For 42 DIV vs. from 7 DIV, for instance, the value obtained for COCS harvested at 42 DIV is compared to the value obtained for COCS harvested at 42 DIV with treatment from 7 DIV.
